# Supplementary material
Source: MDPI journal article supplement (https://www.mdpi.com/2504-477X/5/12/314)
Supplement: s1 [file s1]

Article

# Controllable Synthesis of Graphene-Encapsulated NiFe Nanofiber for Oxygen Evolution Reaction Application

Mengyang Li <sup>1,†</sup>, Jiayi Rong <sup>1,†</sup>, Ning Guo <sup>1</sup>, Susu Chen <sup>1</sup>, Meiqi Gao <sup>1</sup>, Feng Cao <sup>1,\*</sup> and Guoqing Li <sup>2,\*</sup>

1.Key Lab for Anisotropy and Texture of Materials (MoE), School of Materials Science and Engineering, Northeastern University, Shenyang 110819, China.

2.Department of Materials Science and Engineering, North Carolina State University, Raleigh, NC 27695.

\*Correspondence: caof@atm.neu.edu.cn (F.Cao); gli4@ncsu.edu (G. Q. Li)

†These authors contributed equally to this work.

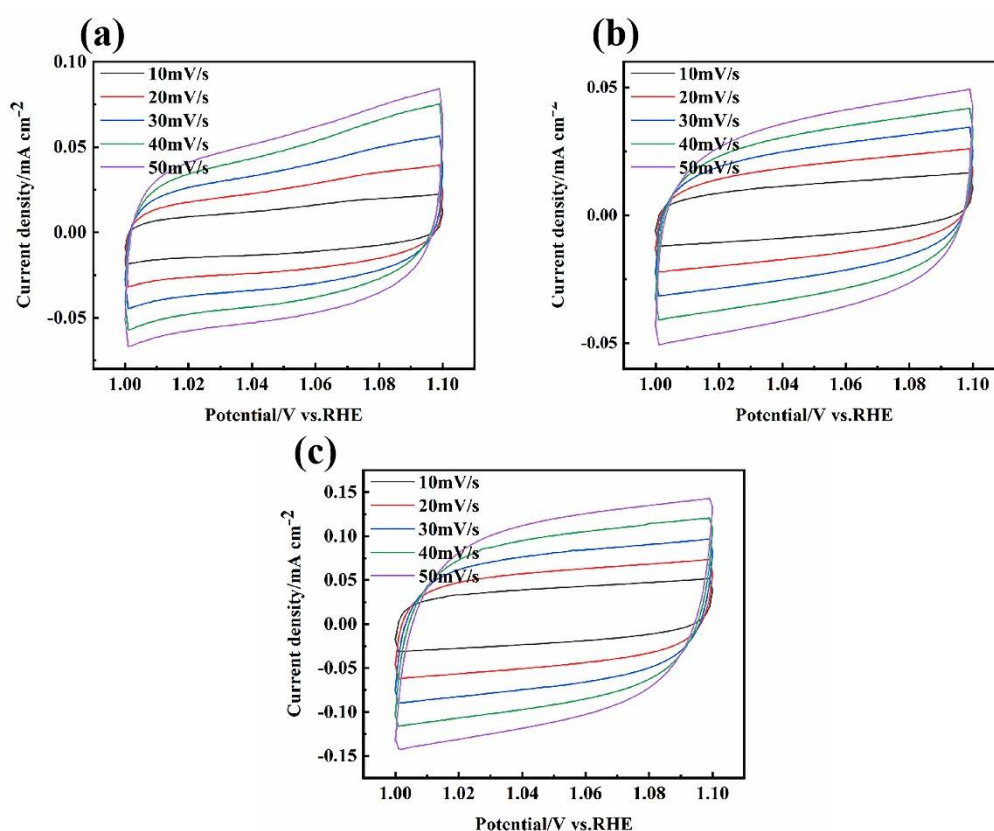

**Figure S1.** Cyclic voltammetry curves of other NixFey@C-CNFs. (a) Ni@C-CNFs. (b) NiFe@C-CNFs. (c) Ni7Fe3@C-CNFs.

**Table S1.** Electrocatalytic performance comparison of reported electrocatalysts.

| Catalyst                                   | $j/\text{mA cm}^{-2}$ | Overpotential/mV | Tafel/mV dec <sup>-1</sup> | Reference |
|--------------------------------------------|-----------------------|------------------|----------------------------|-----------|
| Ni <sub>3</sub> Fe <sub>7</sub> @C-CNFs    | 10                    | 245              | 67                         | This work |
| ZnCo <sub>2</sub> O <sub>4</sub> @NiFe LDH | 10                    | 249              | 96.7                       | [1]       |
| FeNi@NC                                    | 10                    | 280              | 70                         | [2]       |
| NiFeZr MOFs-0.12                           | 10                    | 288              | 66                         | [3]       |

|                                         |    |     |        |     |
|-----------------------------------------|----|-----|--------|-----|
| NiFe alloy foams                        | 10 | 292 | 126.12 | [4] |
| NiFe alloy                              | 10 | 298 | 51.9   | [5] |
| Fe <sub>2</sub> Ni-MIL-88B              | 10 | 307 | 38     | [6] |
| NiFe@CN-G                               | 10 | 320 | 41     | [7] |
| Ni <sub>0.9</sub> Fe <sub>0.1</sub> /NC | 10 | 330 | 45     | [8] |
| NiFe/CN                                 | 10 | 360 | 61.5   | [9] |

[1] Que R H, Liu S, Yang Y, et al. High catalytic performance of core-shell structure ZnCo<sub>2</sub>O<sub>4</sub>@NiFe LDH for oxygen evolution reaction. *Materials Letters*, **2021**, 298: 129982.

[2] Cui X, Ren P, Deng D, et al. Single layer graphene encapsulating non-precious metals as high-performance electrocatalysts for water oxidation. *Energy & Environmental Science: EES*, **2015**, 9(1): 123-129.

[3] Wang Y L, Tang W J, Li X, et al. Improving the electrocatalytic activity of NiFe bimetal-organic framework toward oxygen evolution reaction by Zr doping. *Electrochimica Acta*, **2021**, 381: 138292.

[4] Yang X M, Li Z P, Qin J, et al. Preparation of Ni-Fe alloy foam for oxygen evolution reaction. *Journal of Fuel Chemistry and Technology*, **2021**, 49(6): 827-834.

[5] Lim D, Oh E, Lim C, et al. Bimetallic NiFe alloys as highly efficient electrocatalysts for the oxygen evolution reaction. *Catalysis Today*, **2020**, 352 : 27-33.

[6] Wu C C, Zhang X M, Li H Q, et al. Iron-based binary metal-organic framework nanorods as an efficient catalyst for the oxygen evolution reaction. *Chinese Journal of Catalysis*, **2021**, 42(4): 637-647.

[7] Deng C, Wu K-H, Scott J, et al. Core/Shell NiFe Nanoalloy with a Discrete N-doped Graphitic Carbon Cover for Enhanced Water Oxidation. *ChemElectroChem*, **2018**, 5(5): 732-736.

[8] Zhang X, Xu H M, Li X X, et al. Facile Synthesis of Nickel-Iron/Nanocarbon Hybrids as Advanced Electrocatalysts for Efficient Water Splitting. *ACS catalysis*, **2016**, 6(2): 580-588.

[9] Ci S, Mao S, Hou Y, et al. Rational design of mesoporous NiFe-alloy-based hybrids for oxygen conversion electrocatalysis. *Journal of Materials Chemistry*, **2015**, 3: 7986-7993.
